# Supplementary material for: Nucleolar TFIIE plays a role in ribosomal biogenesis and performance
Source: PubMed Central journal article supplement (PMC8565312; doi:10.1093/nar/gkab866), 2021-09-28

## Supplementary Material: Tables S

**Table S1.** Antibodies of TFIIE, TFIIH, RNA polymerase I transcription machinery, Nucleolus and Ribosomal Proteins are listed below.

| Antibody                                                    | Source         | Identifier       | Application |
|-------------------------------------------------------------|----------------|------------------|-------------|
| <b>TFIIE</b>                                                |                |                  |             |
| rabbit polyclonal TFIIE $\alpha$                            | Abcam          | ab28177          | ChIP        |
| mouse monoclonal TFIIE $\alpha$                             | Santa Cruz     | sc-374014 (B-7)  | IF          |
| rabbit polyclonal TFIIE $\beta$                             | GeneTex        | GTX105029        | WB          |
| rabbit polyclonal TFIIE $\beta$                             | GeneTex        | GTX109005        | WB          |
| rabbit monoclonal TFIIE $\beta$                             | Abcam          | ab187143         | ChIP, IF    |
| <b>TFIIH</b>                                                |                |                  |             |
| mouse monoclonal p62                                        | Santa Cruz     | sc-25329 (H-10)  | WB          |
| mouse monoclonal XPD                                        | Abcam          | ab54676          | WB          |
| mouse monoclonal cdk7                                       | Santa Cruz     | sc-7344 (C-4)    | WB          |
| <b>RNA Polymerase I transcription machinery / Nucleolus</b> |                |                  |             |
| mouse monoclonal UBF                                        | Santa Cruz     | sc-13125 (F-9)   | WB          |
| mouse monoclonal TAF I p110                                 | Santa Cruz     | sc-374551 (C-10) | WB          |
| mouse monoclonal Rrn3                                       | Santa Cruz     | sc-390464 (D-9)  | WB          |
| rabbit polyclonal RPA194                                    | Santa Cruz     | sc-28714 (H-300) | WB          |
| mouse monoclonal RPA194                                     | Santa Cruz     | sc-46699 (F-6)   | WB, IF      |
| mouse monoclonal RPA135                                     | Santa Cruz     | sc-293272 (4H6)  | WB          |
| RPA135                                                      | homemade       |                  | WB, ChIP    |
| rabbit monoclonal Fibrillarin                               | Abcam          | ab166630         | IF          |
| mouse monoclonal Fibrillarin                                | Abcam          | ab4566           | IF          |
| rabbit monoclonal Nucleolin                                 | Cell Signaling | 14574S           | IF          |
| mouse monoclonal Nucleolin                                  | Cell Signaling | 87792S           | IF          |
| <b>Ribosomal proteins</b>                                   |                |                  |             |
| mouse monoclonal RPL4                                       | Santa Cruz     | sc-100838 (RQ-7) | WB          |
| mouse monoclonal RPL5                                       | Santa Cruz     | ab137617         | WB          |
| Mouse monoclonal RPL 9                                      | Santa Cruz     | sc-100828        | WB          |
| mouse monoclonal RPL17                                      | Santa Cruz     | sc-515904 (C-8)  | WB          |
| rsabbit monoclonal RPS15                                    | Abcam          | ab157193         | WB          |
| rabbit monoclonal RPS20                                     | Abcam          | ab133776         | WB          |
| mouse monoclonal RPSA                                       | Santa Cruz     | sc-101517 (16)   | WB          |

**Table S2.** Sequences (5' to 3') of primers used to amplify rDNA regions are listed below.

| <b>Primer</b>           | <b>Forward</b>          | <b>Reverse</b>          | <b>Position (bp)</b> |
|-------------------------|-------------------------|-------------------------|----------------------|
| rDNA1                   | ACCTAGCGGTCACTGTTACTC   | TCAAAGTGGCGATTTCTAG     | -4957                |
| rDNA2                   | TCTGTCTCTGCGTGGATTC     | AGGGAGGGAGAAAGAACAC     | -1200                |
| rDNA3 / promoter region | CTGCGATGGTGGCGTTTTTG    | ACAGCGTGTGAGCAATAACC    | -85                  |
| rDNA4 / 47S             | TGTCAGGCGTTCTCGTCTC     | AGCACGACGTCACCACATC     | 356                  |
| rDNA5                   | GCTCTGCCTCGGAAGGAAG     | CTGCGGTACGAGGAAACAC     | 1241                 |
| rDNA6                   | GACGACCCATTCTGAACGTCT   | CTCTCCGGAATCGAACCCCTG   | 4032                 |
| rDNA7 / 18S             | CGATGCGGCGGCGTTATTCC    | GAACGGCCATGCACCACCAC    | 4796                 |
| rDNA8                   | CGTTGAACCCCATTCGTG      | TATGACCCGCACTTACTCG     | 5281                 |
| rDNA9 / ITS1            | GCGGAGGTTTAAAGACCCCTTGG | GTCGGAAGGTTTACACCACGG   | 6164                 |
| rDNA10                  | TCGTGCGTCGATGAAGAACGCAG | ATTGATCGGCAAGCGACGCTCAG | 6671                 |
| rDNA11/ 28S             | AGTCGGGTTGCTTGGGAATGC   | CCCTTACGGTACTTGTTGACT   | 8260                 |
| rDNA12 / 28S beginning  | CATCAGACCCCAGAAAAGG     | TGATTCGGCAGGTGAGTTG     | 9900                 |
| rDNA13                  | GGCATGTTGGAACAATGTAGG   | CCTTAGAGCCAATCCTTATCC   | 10781                |
| rDNA14 / 28S middle     | CGCCTAGCAGCCGACTTAG     | GTTACTCCCGCCGTTTACCC    | 11590                |
| rDNA15/ 28SETS          | ACCTGGCGCTAAACCATTCTGT  | GGACAAACCCTTGTGTCGAGG   | 12901                |
| rDNA16 / IGS            | CCACAGGTCGAGGCTTCGGT    | GGCGCTCTCTGCGTCTCACT    | 19086                |



## Supplementary Material: Figure S Legends

**Figure S1. Co-localization studies of TFIIIE, TFIIH and TFIIF within the nucleolus using STED microscopy.** (A) STED images of TFIIH (left) and TFIIF (right) with nucleolus marker RNAP1, Fibrillarin and Nucleolin showing strong co-localization of TFIIH with all nucleolus marker and slight co-localization of TFIIF with RNAP1. Scale bar 5  $\mu$ m. (B) STED images of TFIIIE $\beta$  after specific inhibition of RNA polymerase I transcription by BMH-21 indicating re-organization of RNAP1 and Fibrillarin to nuclear caps and re-distribution of TFIIIE $\beta$  enrichment from the nucleolus. Scale bar 5  $\mu$ m. (C) Confocal immunofluorescence microscopy (100X) of WT after ActinomycinD treatment indicate re-distribution of TFIIIE $\beta$  from the nucleolar enrichment and an organization of RNAP1 to nucleolar caps (arrows). Scale bar 5  $\mu$ m.

**Figure S2. Quantification of co-localization studies.** (A-B) Plot Profile of STED images presented in Figure 1A and Figure S1A. Images were analyzed with ImageJ by drawing a line through the nucleolus and measuring the gray value of TFIIIE $\beta$  (A), TFIIH (B, left) and TFIIF (B, right) with RNAP1, Fibrillarin and Nucleolin. Gray value peaks of TFIIIE $\beta$  and TFIIH resemble the peaks of RNAP1, Fibrillarin and Nucleolin, while the peaks of TFIIF are more flat indicating less enrichment of TFIIF to the nucleolus compared to TFIIIE $\beta$  and TFIIH. (C) Plot profile of STED images in Figure S1B showing a distinguish plot profile of TFIIIE $\beta$  and the nucleolus marker RNAP1 and Fibrillarin after BMH-21 treatment. (D) Quantification of IF performed in Figure 1D showing no significant changes of TFIIIE $\alpha$  localization after inhibition of RNA polymerase I transcription by CX5461.

**Figure S3. Binding of TFIIIE $\beta$  to the same rDNA molecule as RNAP1 and UBF at 28S coding region of the rDNA.** (A) Quantitative qPCR analysis of ChIP performed in Figure 2A showing no significant binding of TFIIIE $\beta$  to the Promotor, 18S coding region, but significant binding to the beginning of the 28S coding region. IGS serves as a negative control. (B) Semi-quantitative PCR analysis and of ChIP and sequential ChIP indicating TFIIIE $\beta$  binds to the same rDNA molecule as RNAP1 and UBF at the 28S coding region. Quantitative qPCR analysis of ChIP (C) and sequential ChIP (D) performed in (B) showing significant binding of TFIIIE $\beta$  to the same rDNA molecule as UBF at the 28S coding region. (E) Full images of Co-immunoprecipitation performed in Figure 2E. Data are represented as mean  $\pm$  SD. ns  $p > 0.05$ , \*  $p \leq 0.05$ , \*\*  $p \leq 0.01$ , \*\*\*  $p \leq 0.001$ , \*\*\*\*  $p \leq 0.0001$  of three independent experiments.

**Figure S4. Reduced TFIIIE protein level in TTD cell line.** (A) Sequence analysis of TTD218UT (left) and TTD28N (right) compared to WT shows a homozygous mutation (c.559C>A [p.Asp187Tyr]) in both TTD cell lines. (B) Immunofluorescence microscopy (100X) of WT cells reveal co-localization of TFIIIE and nucleolus marker including Fibrillarin and Nucleolin in WT and reconstituted cells. Reduced fluorescence signals of both TFIIIE subunits were observed in TTD cells. (C) Western Blot analysis indicates reduced protein abundance of both TFIIIE subunits in TTD cells compared to WT and reconstituted cells, whereas the protein abundance of TFIIH is unaffected in TFIIIE $\beta$ -mutated cells. (D-E) Quantification of western blot analysis in Figure S4 C indicate significant reduced protein level of both TFIIIE subunits and wild-type protein level of TFIIH.

**Figure S5. Disturbed rRNA synthesis in TTD cells. (A) Left:** Nuclear Run-On assay shows level of freshly transcribed pre-rRNA in WT, reconstituted and TTD cells. Primer used for Nuclear Run-on analysis are indicated by arrowheads and numbers in the schem of the rRNA subunit. Exact primer sequence are given in Table S2. Nuclear Run-on assay detects in TTD cells significant reduced level of freshly transcribed pre-rRNA starting from 5.8S coding region to 28S coding region of the rDNA indicating a disturbance in the elongation of RNA polymerase I transcription in TTD cells. **Right:** Nuclear Run-on assay in WT, reconstituted and TTD cells detecting mRNA of actin shows no significant differences. **(B)** Quantification of Northern Blot performed in Figure 3C indicating significantly increased mature 5S rRNA level in TTD218UT and increased tendency in TTD28N.

**Figure S6. Disturbed rRNA processing and ribosomal composition in TTD cells. (A)** Full images of northern blot analysis. Membranes were probed with ITS1 (red), stripped, and re-probed with ITS2 (purple). **(B)** Quantification of 18S-E/47S ratio in WT, reconstituted and TTD cells indicating increased 18S-E level in TTD cells. **(C)** Volcano plot shows a non-significant decreased amount of ribosomal protein of the small 40S ribosome subunit (RPS) and a non-significant increased amount of ribosome protein of the big 60S ribosome subunit (RPL) in TTD cells compared to reconstituted cells. **(D)** Western blot analysis of whole cell lysate and isolated ribosome in WT, reconstituted 218UT TFIIE $\beta$  cells and TTD218UT cells. **(E)** Quantification of Western Blots of three ribosomal preparations and selected ribosomal proteins point towards a tendency of over- and underrepresented proteins in lysates and ribosomal preparations. **(F)** Quantification of FISH analysis performed in Figure 4B showing no significant differences in the CTCF of U2 in TTD cells.

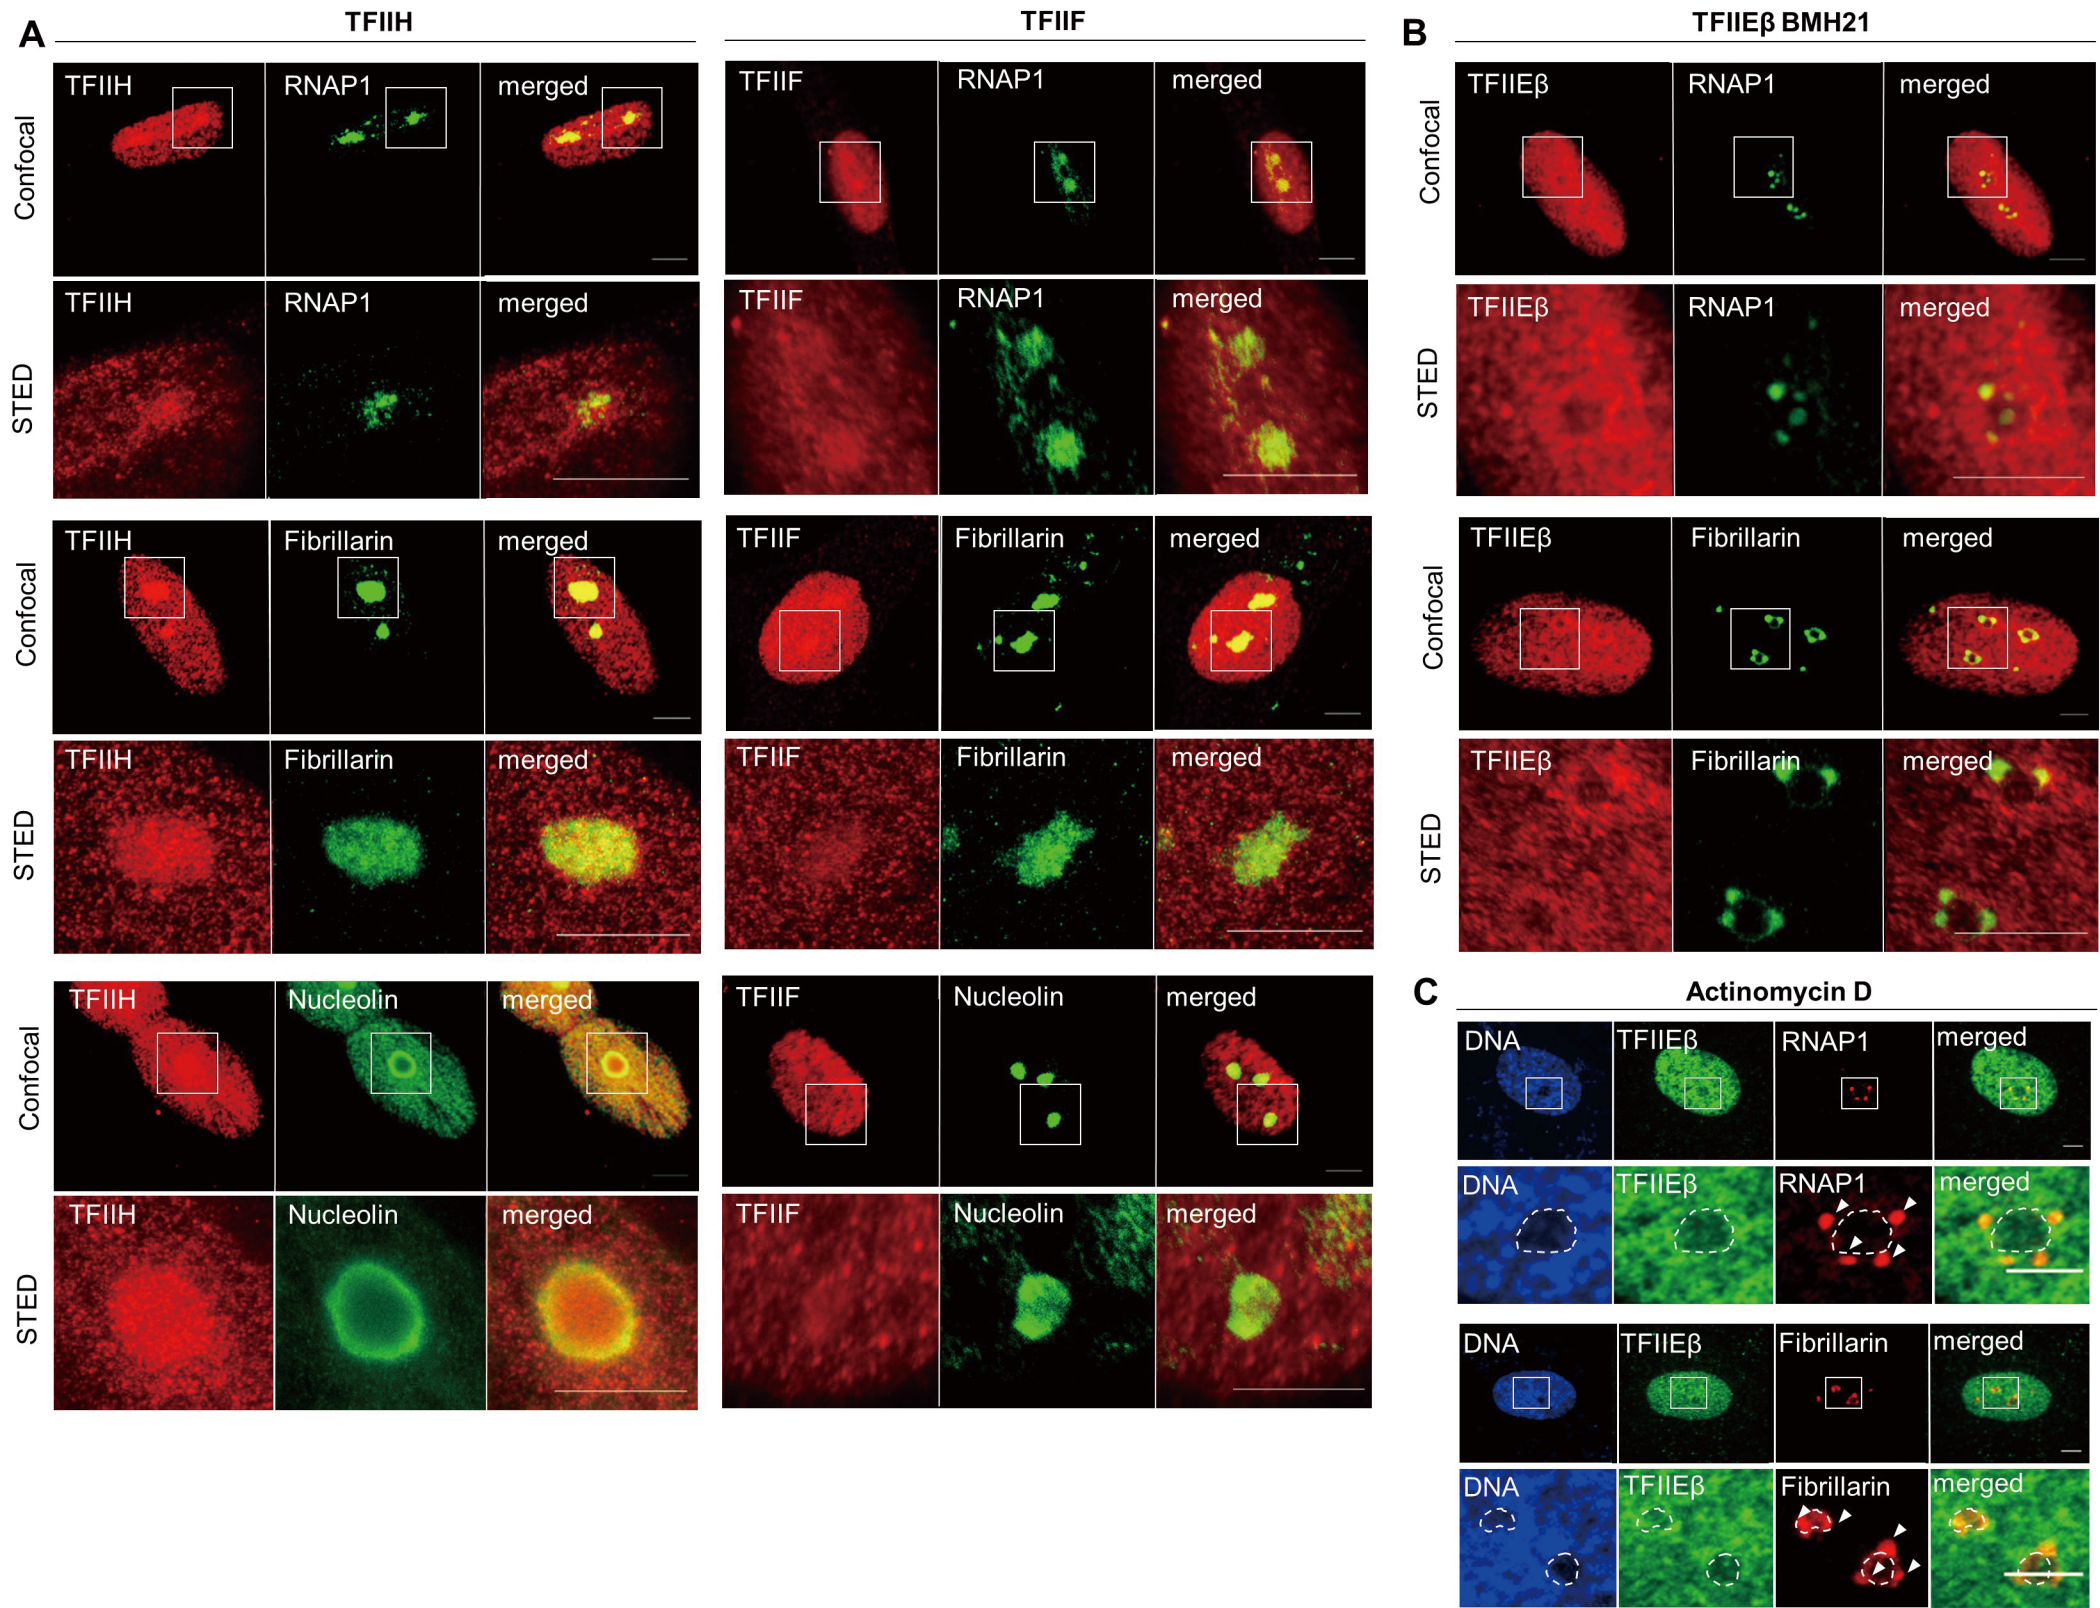

**Figure S1**



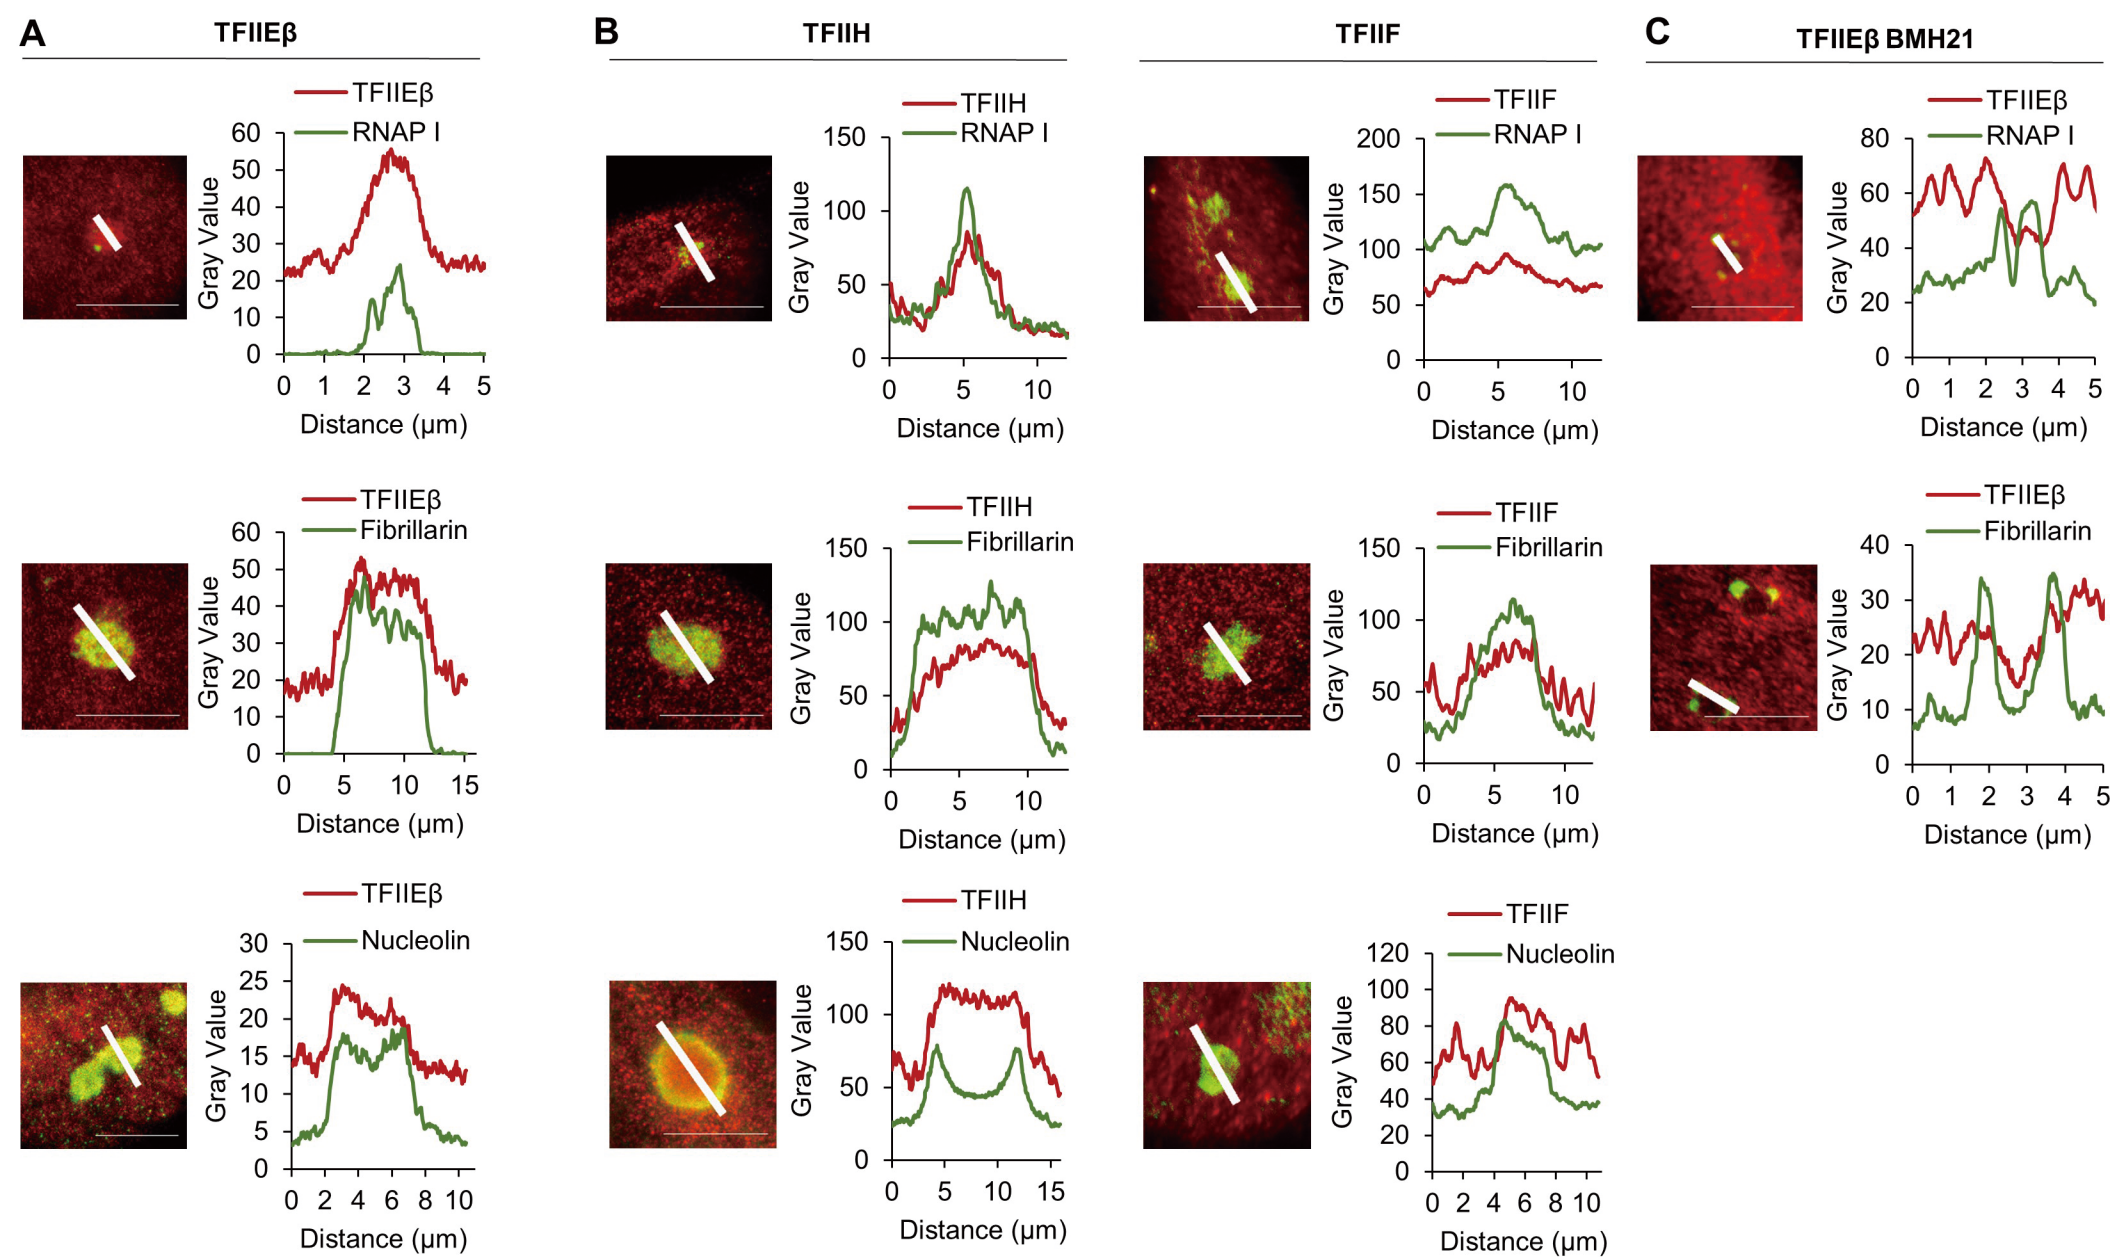

Figure S2

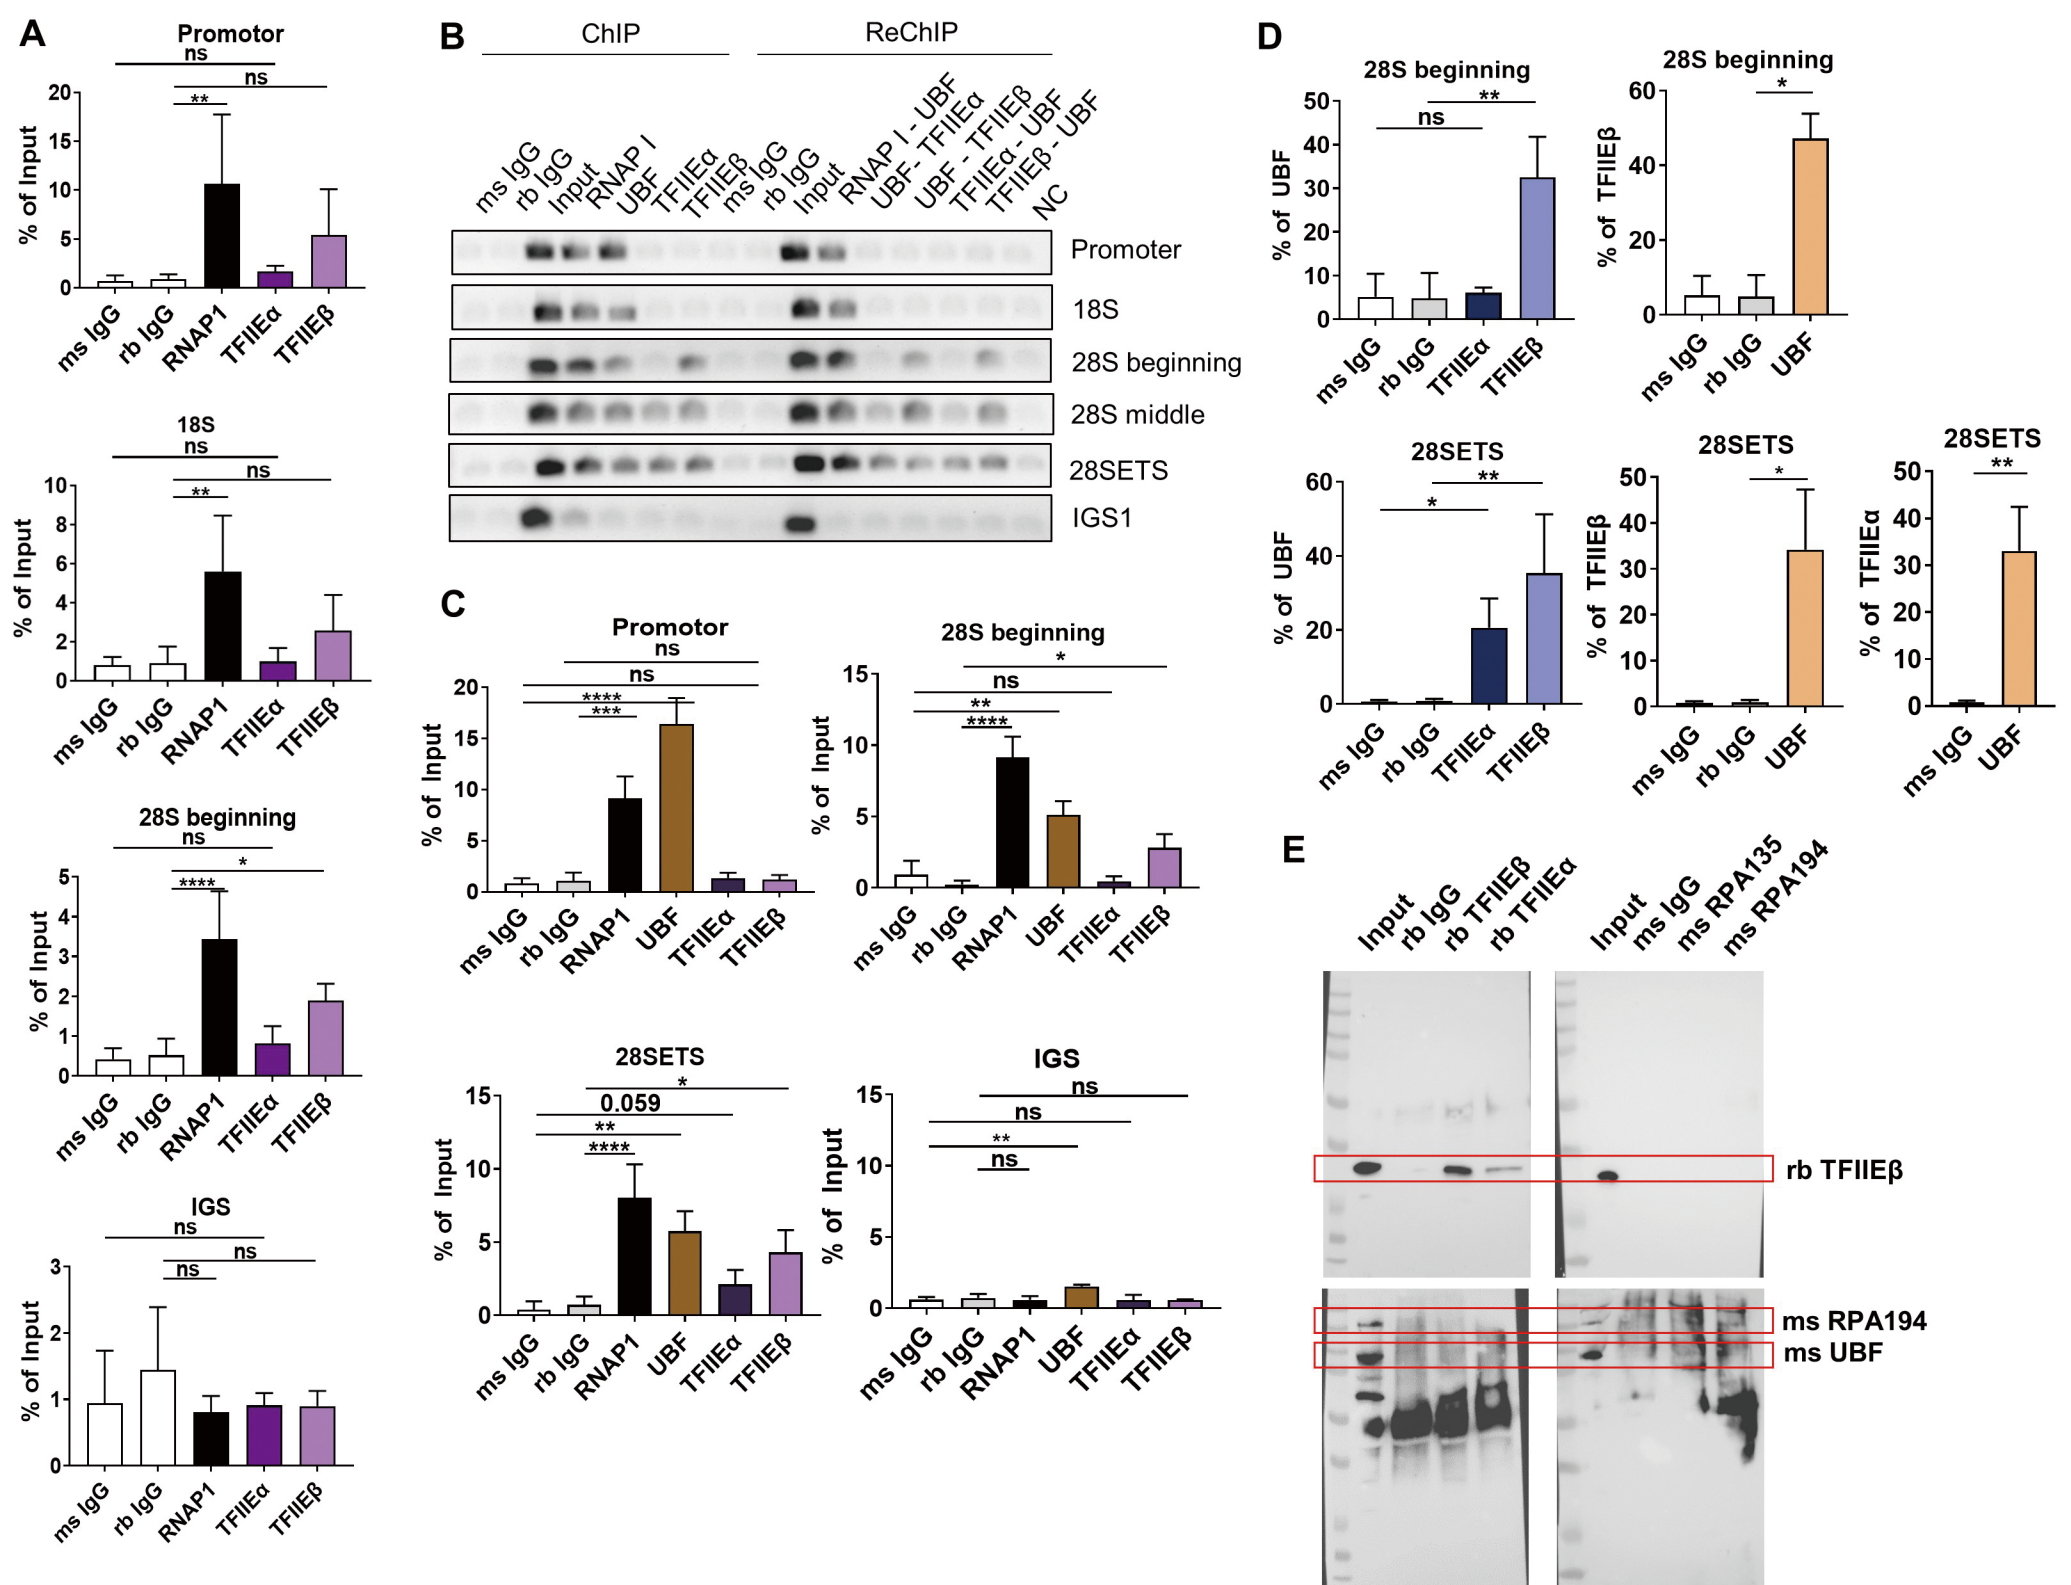

Figure S3



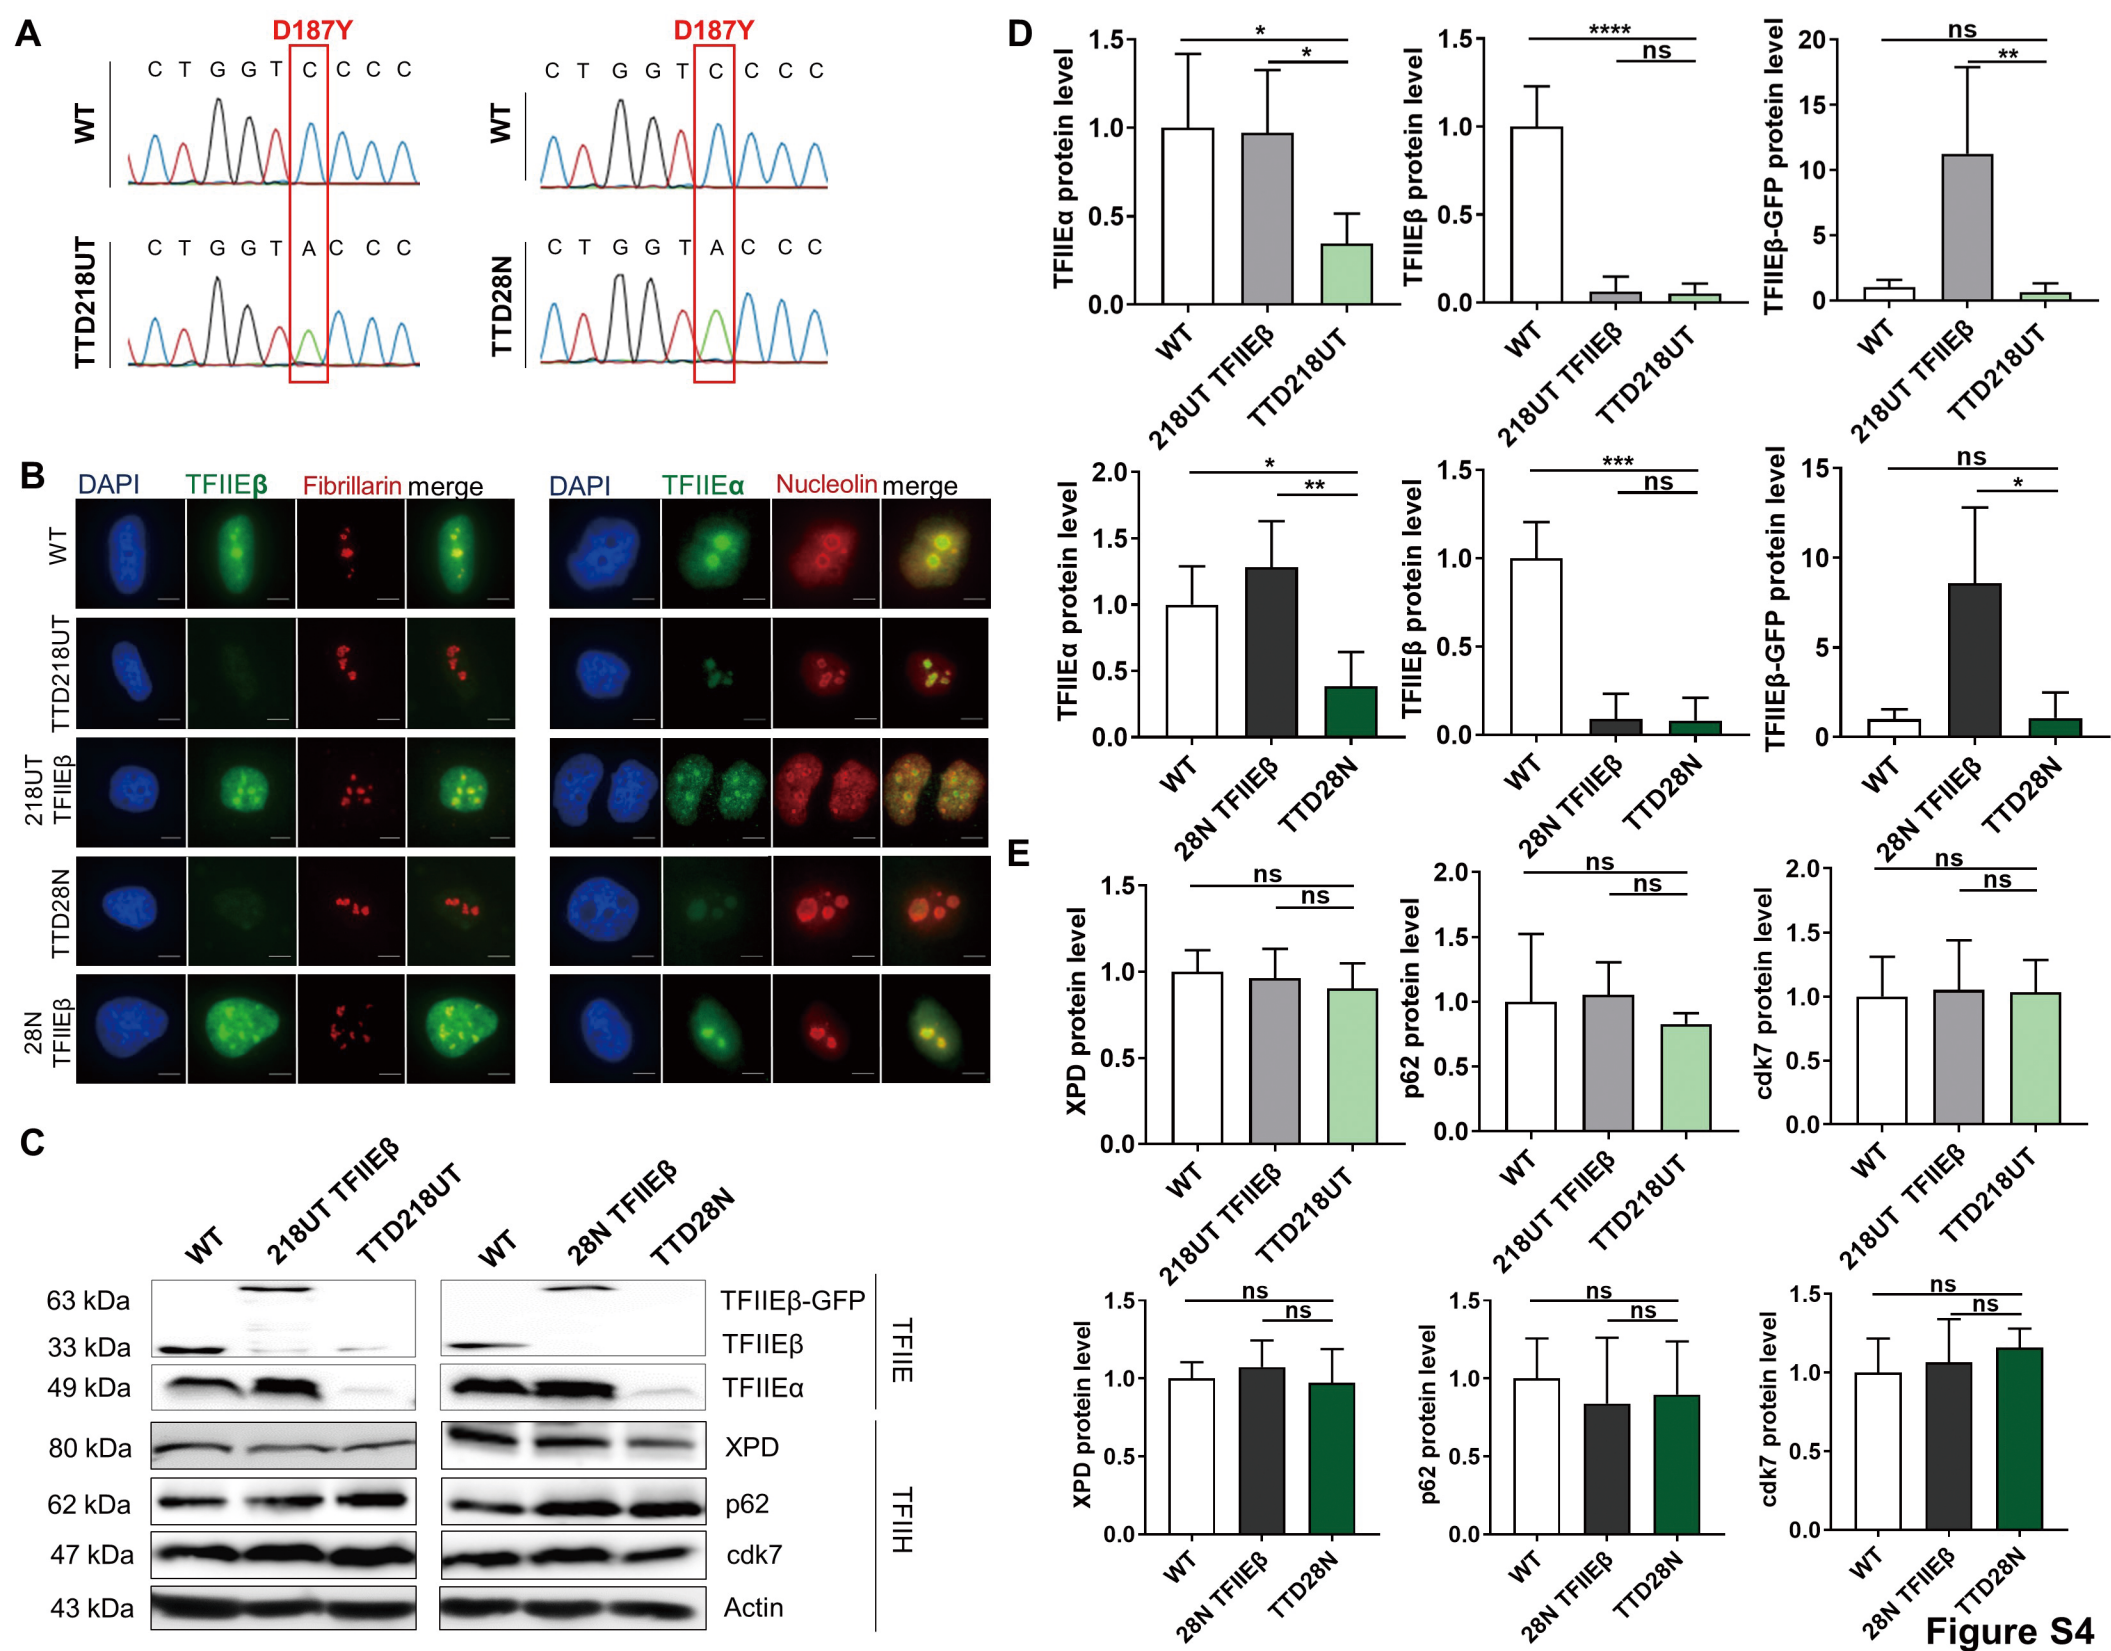

**A**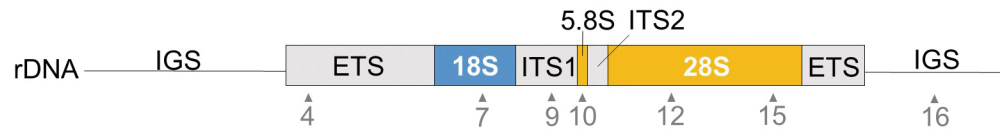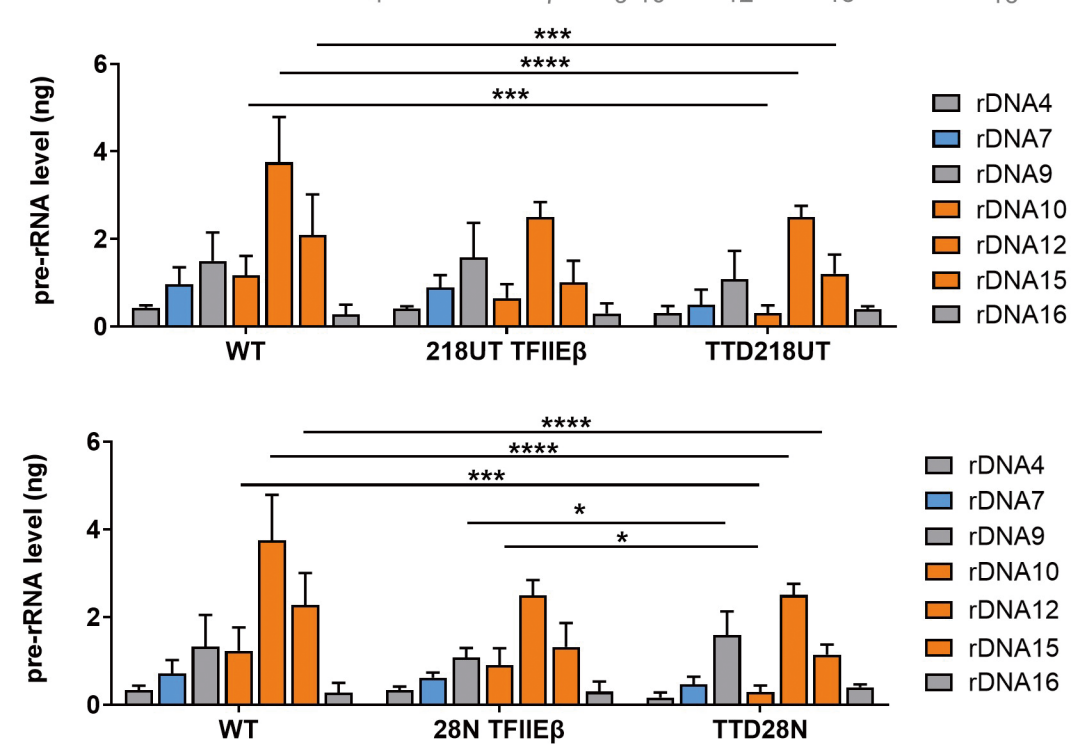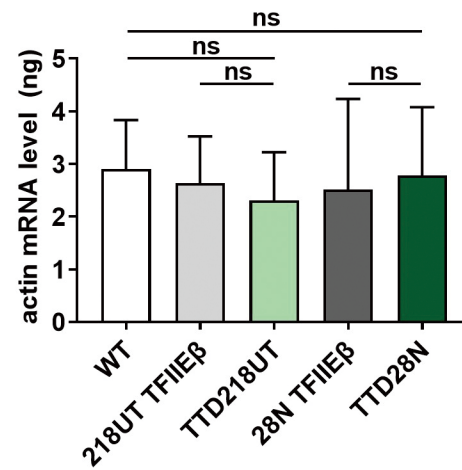**B**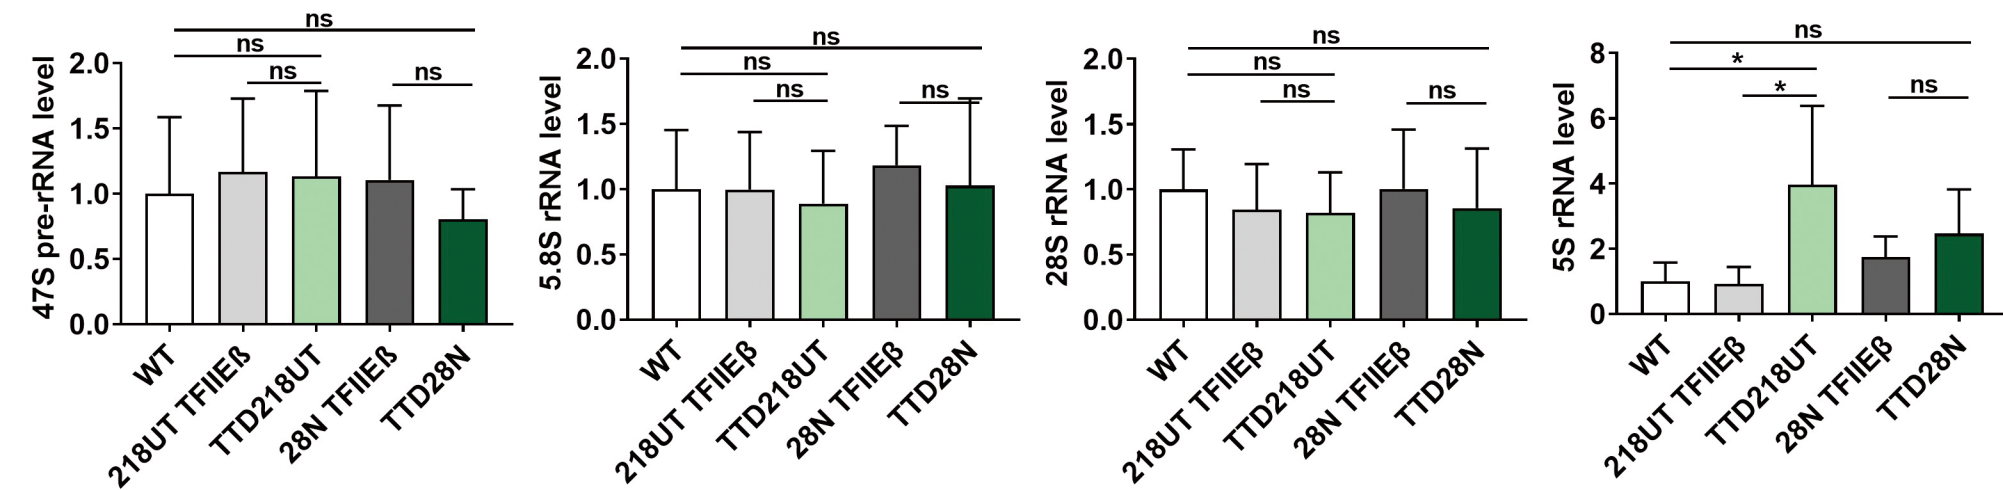

Figure S5

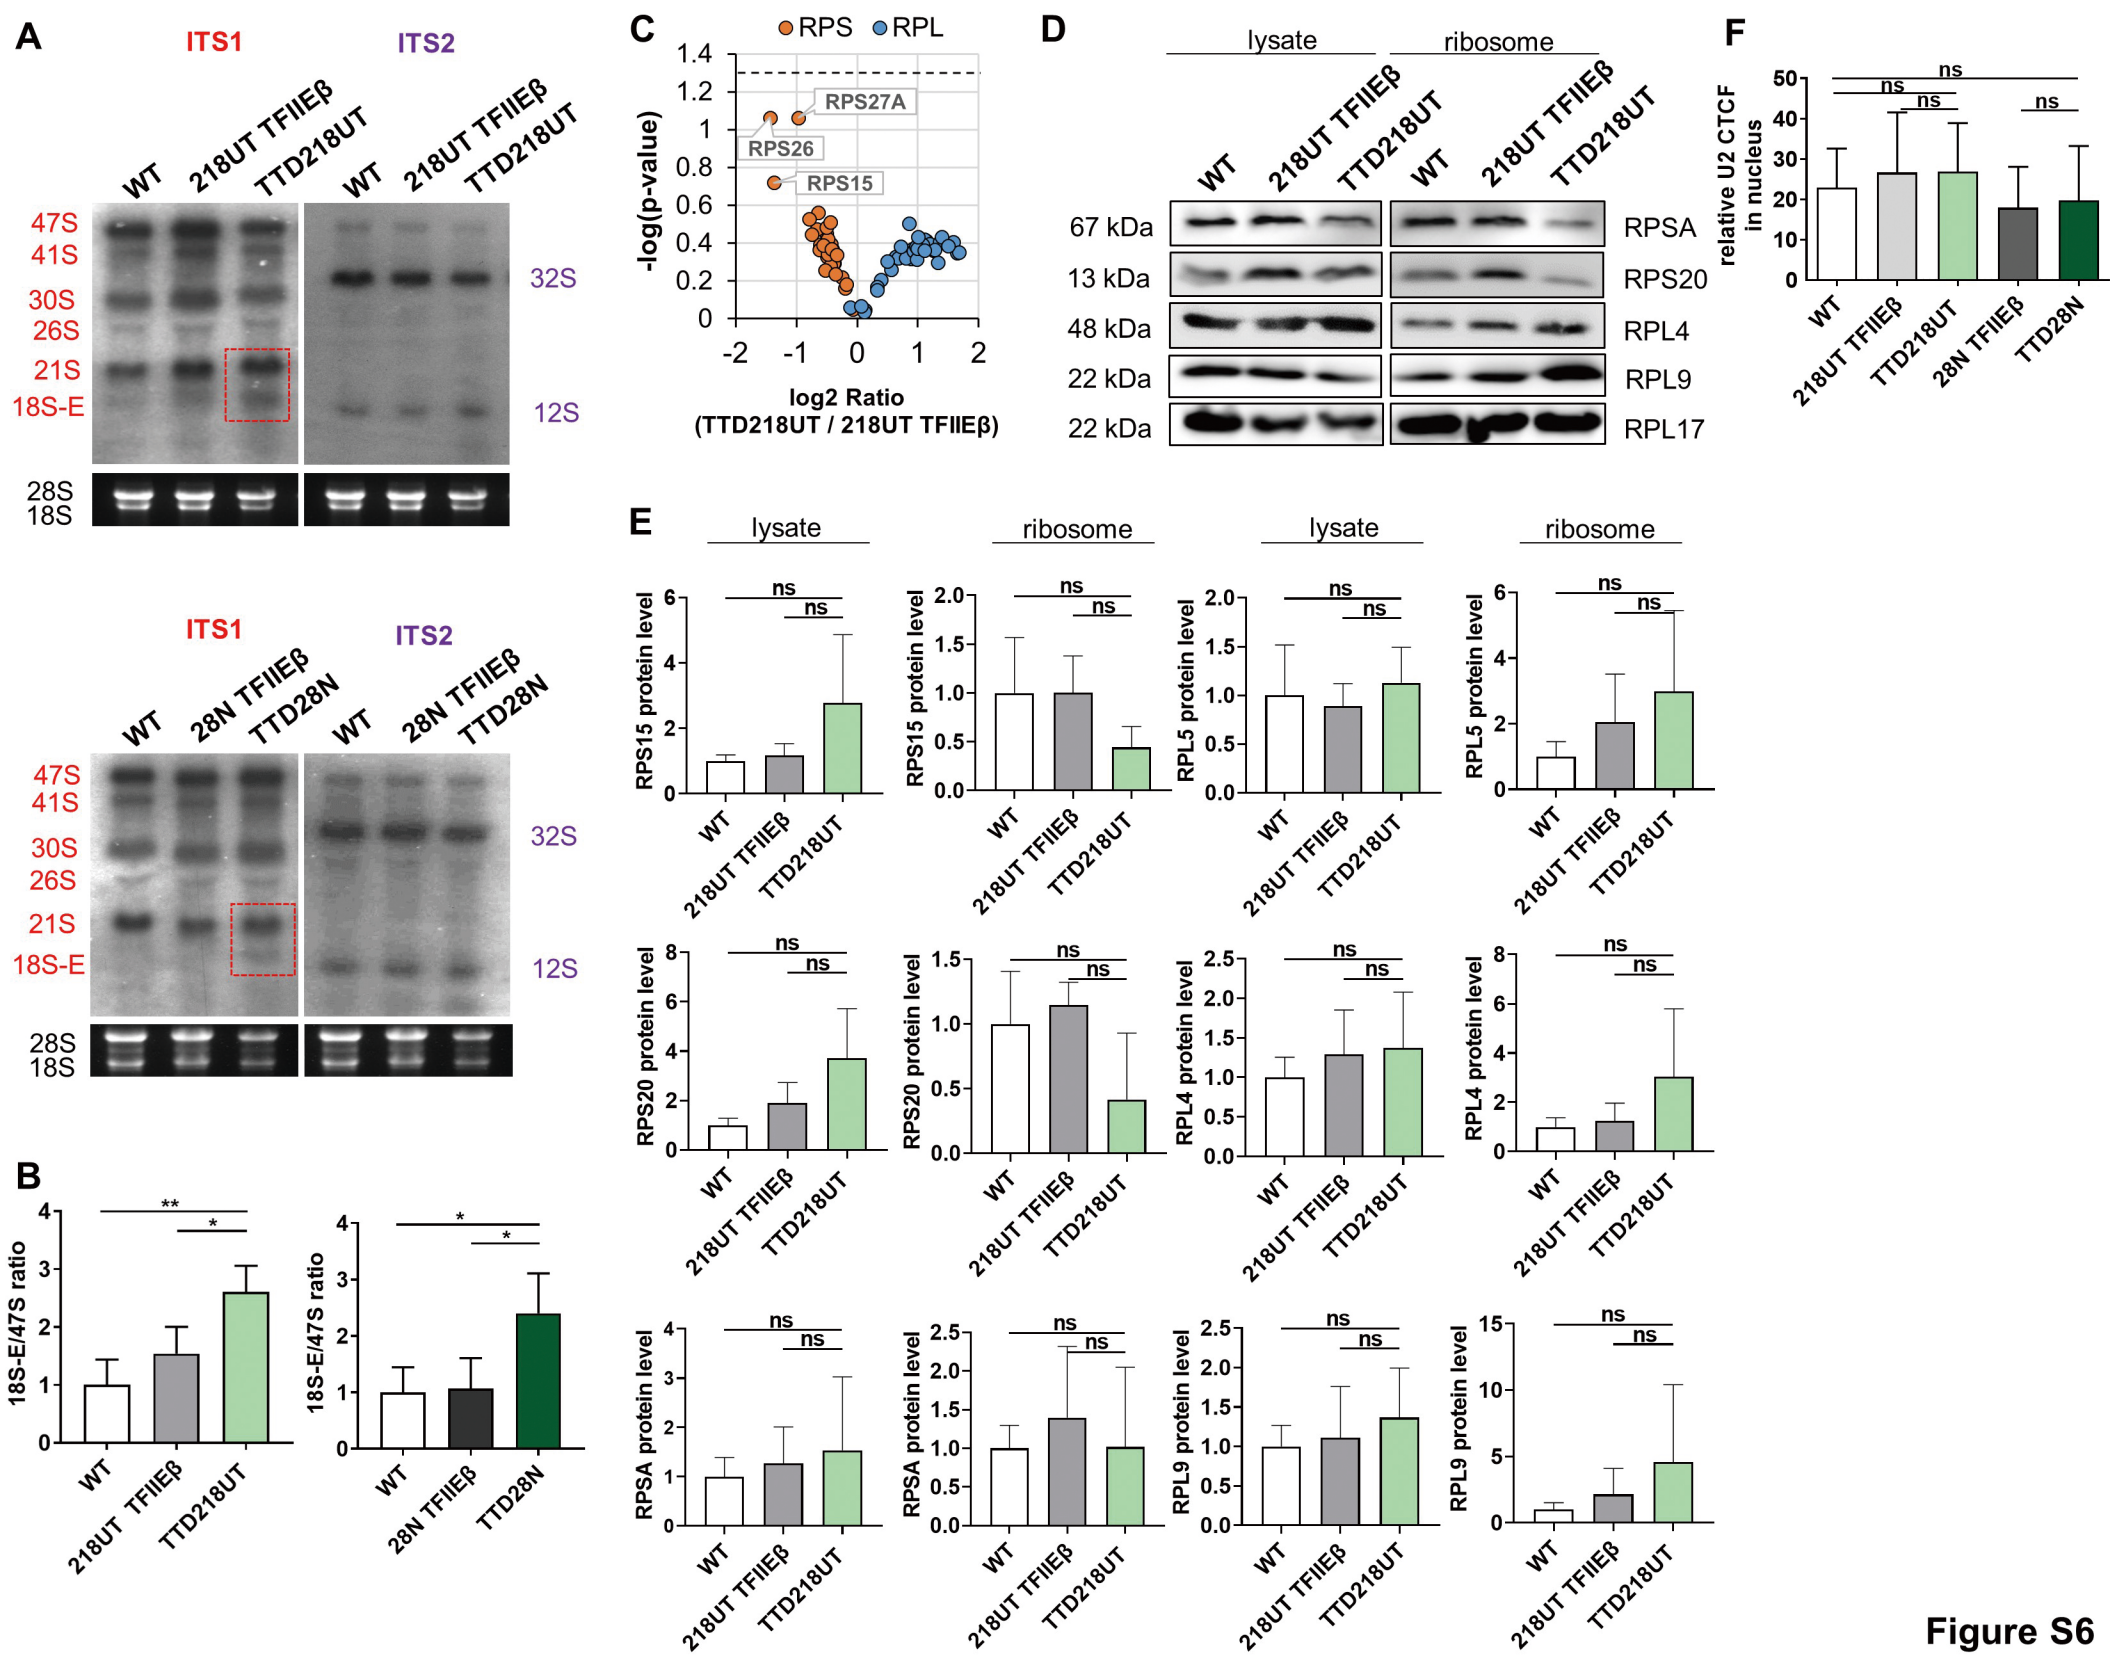

Supplement: gkab866_supplemental_file.pdf [file gkab866_supplemental_file.pdf]
